# Supplementary material for: A novel function of STAT3β in suppressing interferon response improves outcome in acute myeloid leukemia
Source: PubMed Central journal article supplement (PMC11133483; doi:10.1038/s41419-024-06749-9), 2024-05-28
Supplement: 41419_2024_6749_MOESM1_ESM.pdf [file 41419_2024_6749_MOESM1_ESM.pdf]

1 **“A novel function of STAT3 $\beta$  in suppressing interferon response improves outcome in**  
2 **acute myeloid leukemia” by Edtmayer et al.**

3 **Supplementary materials and methods**

4 **Genotyping PCR**

5 DNA was isolated from tissue samples of mouse offspring or cell pellets using the Extracta™  
6 DNA prep for PCR for tissue (Quantabio, Beverly, MA, USA) followed by PCR using OneTaq®  
7 Quick-Load 2x Master Mix with Standard Buffer (New England BioLabs, Ipswich, MA, USA)  
8 according to the manufacturer’s protocol. Primer sequences are listed in **Suppl. Table 1**.

9 **RNA isolation and RT-qPCR**

10 RNA was isolated using QIAzol Lysis Reagent (Qiagen, Hilden, Germany) or for patient  
11 samples using the RNeasy Mini Kit (Qiagen). Reverse transcription was performed using  
12 RevertAid H Minus First Strand cDNA Synthesis Kit (Thermo Fisher Scientific, Waltham, MA,  
13 USA) according to the manufacturer’s instructions. Reverse transcription-quantitative  
14 polymerase chain reaction (RT-qPCR) was performed in triplicates using SsoAdvanced™  
15 Universal SYBR® Green Supermix (Bio-rad, Hercules, CA, USA) and measured on a qTower<sup>3</sup>  
16 (Analytik Jena, Jena, Germany). Readings were normalized to  *$\beta$ -actin* (mouse) or *GAPDH*  
17 (human) and quantified as described.(1) Primer sequences are listed in **Suppl. Table 1**.

18 **Western blot**

19  $1 \times 10^5$  cells were lysed in 10 $\mu$ l 1x Laemmli sample buffer (Bio-rad) and incubation for 20min at  
20 95°C. Equal amounts of protein were loaded on a 10% SDS-polyacrylamide gel and blotted  
21 onto a 0.45 $\mu$ m polyvinylidene fluoride (PVDF) membrane (Thermo Fisher Scientific). After  
22 blocking with 5% milk in phosphate-buffered saline (PBS) supplemented with 0.1% Tween20  
23 (PBS-T), membranes were incubated in primary antibody (**Suppl. Table 2**) diluted in 5%  
24 bovine serum albumin (BSA) in PBS-T overnight at 4°C. After washing, membranes were  
25 incubated in 5% BSA in PBS-T containing the HRP-linked secondary antibody (**Suppl. Table**  
26 **2**). For detection, SuperSignal™ West Femto Maximum Sensitivity Substrate (Thermo Fisher  
27 Scientific) was added and imaged using a ChemiDoc imager (Bio-rad). Protein expression was  
28 quantified using ImageJ (version 1.53t) and normalized to ACTIN. Original full length  
29 uncropped Western blots can be found in the Supplemental Material.

30 **Blood analysis and organ processing**

31 Peripheral blood was collected *via* puncture of the *vena facialis* in EDTA tubes and analyzed  
32 using a blood counter (Scil Vet ABC, Gurnee, IL, USA). Peripheral blood smears were stained  
33 using an H&E fast staining kit (Carl Roth, Mannheim, Germany). Plasma was collected by

34 centrifugation for 15min at 2,000g and 4°C. Supernatant was collected and stored at -80°C  
35 until further usage. Spleens were isolated and mashed through a 70µm cell strainer followed  
36 by red blood cell lysis. Bone marrow cells were harvested from hind legs. Samples were  
37 cryopreserved as single cells suspension in FBS supplemented with 10% DMSO and stored  
38 at -80°C until needed. For flow cytometry analysis the samples were thawed in PBS, stained,  
39 and analyzed simultaneously.

#### 40 **RNA sequencing**

41 Leukemic blasts were isolated from bone marrow and spleen of diseased animals by sorting  
42 Venus<sup>+</sup> cells using a BD FACSymphony™ S6 Cell Sorter (BD Bioscience) and analyzed using  
43 BD FACSDiva Software. RNA was isolated using RNeasy Mini Kit (Qiagen) and sequenced  
44 with an Illumina HiSeq3000/4000 sequencer using 50bp single-end libraries. Quality checks of  
45 the raw sequence reads were done with FastQC(2) (version 0.11.9). Then we applied  
46 PRINSEQ-lite(3) (version 0.20.4) for quality based read filtering and trimming. The remaining  
47 high-quality reads were aligned against the mouse reference genome (GRCm38) using  
48 STAR(4) (version 2.5.0b) and post processed with samtools(5) (version 1.4). Read counts  
49 were obtained with featureCounts(6) (version 2.0.3) and for normalization and differential gene  
50 expression analysis we applied DESeq2(7) (version 1.40.2). GSEA (GSEA version 4.2.2) was  
51 done with genes that show an adjusted p-value < 0.05 according to the provider's protocol.(8)  
52 Gene sets were downloaded from the Molecular Signature Database  
53 (<http://software.broadinstitute.org/gsea/msigdb/index.jsp>) and permutations were set to 1,000.

#### 54 **Multiplex immunoassay**

55 Cytokine levels were measured in plasma of diseased animals (1:2 dilution) using the  
56 ProcartaPlex™ Mouse and Rat Mix & Match panels (Invitrogen, Thermo Fisher Scientific)  
57 according to the manufacturer's protocol. All measurements were performed using a Bio-Plex  
58 200 System (Bio-rad) following the manufacturer's instructions.

#### 59 **Retroviral infection**

60 Platinum-E packaging cells were transfected with the *pMSCV-MLL-AF9-IRES-Venus*  
61 construct, which was a kind gift from Johannes Zuber (Research Institute of Molecular  
62 Pathology, Vienna, Austria), by calcium phosphate co-precipitation. FLCs were thawed and  
63 cultured one day prior to infection and spinoculated at 1,000g for 90min three times on two  
64 consecutive days with retroviral supernatant supplemented with 10µg/ml polybrene (Sigma-  
65 Aldrich, St. Louis, MO, USA). Two days after the first infection 2x10<sup>5</sup> MLL-AF9/Venus<sup>+</sup> cells  
66 were transplanted into 6 to 8 weeks old male immunocompromised NOD.Cg-  
67 Prkdc<sup>scid</sup>Il2rg<sup>tm1Wjl</sup>/SzJ mice (The Jackson Laboratory, Bar Harbor, ME, USA) *via* tail vein  
68 injection. The remaining cells were cultured until homogenous Venus<sup>+</sup> cells were obtained.

69 Similarly, the two other AML cell lines were generated using the *pMSCV-FlagMLL-pI-ENL*  
70 construct (Addgene plasmid #20873),(9) which was a gift from Robert Slany (University of  
71 Erlangen, Bavaria, Germany) and the *pMSCV-NUP98-HOXD13-IRES-GFP* construct provided  
72 by Rotraud Wieser (Medical University of Vienna, Vienna, Austria).

### 73 **Cell culture**

74 Unless otherwise stated, all cell culture reagents were purchased from Gibco (Thermo Fisher  
75 Scientific). All cells were maintained under 37°C, 95% humidity and 5% CO<sub>2</sub>. Platinum-E  
76 packaging cells were a kind gift of Florian Grebien (University of Veterinary Medicine Vienna,  
77 Vienna, Austria) and cultured in DMEM supplemented with 10% FBS, 100U/ml  
78 penicillin/streptomycin, 2mM L-glutamine. Murine primary cells were cultured in DMEM and  
79 IMDM (1:1) supplemented with 10% FBS, 100U/ml penicillin/streptomycin, 4mM L-glutamine,  
80 50µM β-mercaptoethanol, 10ng/ml hIL-6 (Immunotools GmbH, Friesoythe, Germany), 10ng/ml  
81 mL-3 (ImmunoTools GmbH) and 100ng/ml mSCF (generated in-house). *Ex vivo* cells were  
82 established by continuous culture of AML blasts isolated from bone marrow and spleen of  
83 diseased animals as described.(10) Experiments with *ex vivo* cells were performed in RPMI  
84 supplemented with 10% FBS, 100U/ml penicillin/streptomycin, 4mM L-glutamine, 100ng/ml  
85 mSCF. All cells were regularly tested for mycoplasma contamination using the MycoAlert  
86 Detection Kit (Lonza, Verviers, Belgium) according to the manufacturer's instructions. For  
87 granulocyte-colony stimulating factor (G-CSF) stimulation cell culture medium was  
88 supplemented with 10ng/ml G-CSF (PeproTech, Rocky Hill, NJ, USA) and refreshed every two  
89 to three days. For all interferon treatments 100U/ml recombinant mouse IFNβ (Sigma-Aldrich)  
90 or 100ng/ml recombinant mouse IFNγ (Immunotools GmbH) was supplemented.

### 91 **Growth curves**

92 1.5x10<sup>5</sup> cells were seeded in triplicates in 12-well plates containing 1ml cell culture medium on  
93 day 0. For up to 4 days cell numbers were measured using a Cytoflex S (Beckman Coulter).

### 94 **Cell cycle and apoptosis staining**

95 For cell cycle analysis, cells were fixed using ice-cold 70% ethanol and stained with 5µl 7AAD  
96 (eBioscience, Thermo Fisher Scientific) followed by flow cytometry analysis. For apoptosis  
97 analysis, cells were fixed using Annexin V Binding Buffer (BioLegend, San Diego, CA, USA),  
98 followed by staining with 5µl Annexin V (BioLegend) and 5µl 7AAD in 100µl Annexin V Binding  
99 Buffer. All samples were analyzed using a Cytoflex S (Beckman Coulter).

100 **Supplementary References**

- 101 1. Livak KJ, Schmittgen TD. Analysis of Relative Gene Expression Data Using Real-Time  
102 Quantitative PCR and the  $2^{-\Delta\Delta CT}$  Method. *Methods* **25**, 402-408 (2001).
- 103 2. Babraham Bioinformatics: FastQC A Quality Control tool for High Throughput Sequence  
104 Data. 2024. <https://www.bioinformatics.babraham.ac.uk/projects/fastqc/>.
- 105 3. Schmieder R, Edwards R. Quality control and preprocessing of metagenomic datasets.  
106 *Bioinformatics* **27**, 863-864 (2011).
- 107 4. Dobin A, Davis CA, Schlesinger F, Drenkow J, Zaleski C, Jha S, et al. STAR: ultrafast  
108 universal RNA-seq aligner. *Bioinformatics* **29**, 15-21 (2013).
- 109 5. Li H, Handsaker B, Wysoker A, Fennell T, Ruan J, Homer N, et al. The Sequence  
110 Alignment/Map format and SAMtools. *Bioinformatics* **25**, 2078 (2009).
- 111 6. Liao Y, Smyth GK, Shi W. featureCounts: an efficient general purpose program for  
112 assigning sequence reads to genomic features. *Bioinformatics* **30**, 923-930 (2014).
- 113 7. Love MI, Huber W, Anders S. Moderated estimation of fold change and dispersion for  
114 RNA-seq data with DESeq2. *Genome Biol* **15**, 1–21 (2014).
- 115 8. Subramanian A, Tamayo P, Mootha VK, Mukherjee S, Ebert BL, Gillette MA, et al. Gene  
116 set enrichment analysis: A knowledge-based approach for interpreting genome-wide  
117 expression profiles. *Proc Natl Acad Sci U S A* **102**, 15545–15550 (2005).
- 118 9. Bach C, Mueller D, Buhl S, Garcia-Cuellar MP, Slany RK. Alterations of the CxxC  
119 domain preclude oncogenic activation of mixed-lineage leukemia 2. *Oncogene* **28**, 815–  
120 823 (2009).
- 121 10. Schmoellerl J, Barbosa IAM, Eder T, Brandstoetter T, Schmidt L, Maurer B, et al. CDK6  
122 is an essential direct target of NUP98 fusion proteins in acute myeloid leukemia. *Blood*  
123 **136**, 387-400 (2020).

124

125

126 **Supplementary Table 1:** Patient characteristics.

| Patient characteristics                                            |            |
|--------------------------------------------------------------------|------------|
| <b>Total number of patients</b>                                    | 79         |
| Males                                                              | 50 (63.3%) |
| Females                                                            | 29 (36.7%) |
| <b>Age (years)</b>                                                 |            |
| Median                                                             | 66         |
| Range                                                              | 23-89      |
| <b>WBC at diagnosis (10<sup>9</sup>/l)</b>                         |            |
| Median                                                             | 6          |
| Range                                                              | 0-388      |
| <b>BM blasts at diagnosis (%)</b>                                  |            |
| Median                                                             | 68         |
| Range                                                              | 15-100     |
| <b>Pathogenic/likely pathogenic mutations (number of samples)</b>  |            |
| KRAS                                                               | 12         |
| NRAS                                                               | 14         |
| RUNX1                                                              | 13         |
| IDH2                                                               | 8          |
| WT1                                                                | 2          |
| ASXL1                                                              | 14         |
| TET2                                                               | 24         |
| DNMT3A                                                             | 13         |
| NPM1                                                               | 11         |
| CEBPA                                                              | 13         |
| TP53                                                               | 17         |
| FLT3 / FLT3-IDH                                                    | 0          |
| Other Mutations (IDH1, CRSF2, STAG2, KIT, etc.)                    | 48         |
| <b>Therapy</b>                                                     |            |
| Intensive incl. allogeneic hematopoietic stem cell transplantation | 45         |
| Non-intensive                                                      | 28         |
| Best supportive care                                               | 6          |

127

128

| Gene                           | Primer sequence (5' → 3') | Method          |
|--------------------------------|---------------------------|-----------------|
| Stat3 WT forward <sup>11</sup> | TGGCTGGCAAGGGCTTCTCCTT    | Genotyping PCR  |
| Stat3 WT reverse <sup>11</sup> | TGCCAGTGGCCAGCAGGTGGA     | Genotyping PCR  |
| Stat3Δαβ forward <sup>11</sup> | CAGGTCCTGCCCGTACCTGA      | Genotyping PCR  |
| Stat3Δαβ reverse <sup>11</sup> | CTGCATTCTAGTTGTGGTTTGTCC  | Genotyping PCR  |
| Stat3α forward                 | GTCTACCTCTACCCCGACATTCC   | RT-qPCR (mouse) |
| Stat3α reverse                 | CATCGGCAGGTCAATGGTATTGC   | RT-qPCR (mouse) |
| Stat3β forward                 | GTCTACCTCTACCCCGACATTCC   | RT-qPCR (mouse) |
| Stat3β reverse                 | CCAAACTGCATCAATGAATGGTGT  | RT-qPCR (mouse) |
| β-actin forward                | GCTCATAGCTCTTCTCCAGGG     | RT-qPCR (mouse) |
| β-actin reserve                | CCTGAACCCTAAGGCCAACCG     | RT-qPCR (mouse) |
| Csf3r forward                  | CTGATCTTCTTGCTACTCCCA     | RT-qPCR (mouse) |
| Csf3r reverse                  | GGTGTAGTTCAAGTGAGGCAG     | RT-qPCR (mouse) |
| Gbp2 forward                   | CTGCACTATGTGACGGAGCTA     | RT-qPCR (mouse) |
| Gbp2 reverse                   | GAGTCCACACAAAGGTTGGAAA    | RT-qPCR (mouse) |
| Gbp4 forward                   | GGAGAAGCTAACGAAGGAACAA    | RT-qPCR (mouse) |
| Gbp4 reserve                   | TTCCACAAGGGAATCACCATTTT   | RT-qPCR (mouse) |
| Ube2l6 forward                 | GTGGCGAAAGAGCTGGAGAG      | RT-qPCR (mouse) |
| Ube2l6 reverse                 | GGGGAAATCAATCCGCACTTG     | RT-qPCR (mouse) |
| Stat1 forward                  | TCACAGTGGTTCGAGCTTCAG     | RT-qPCR (mouse) |
| Stat1 reverse                  | GCAAACGAGACATCATAGGCA     | RT-qPCR (mouse) |
| Ifna forward                   | ATGGCTAGGCCCTTTGCTTTC     | RT-qPCR (mouse) |
| Ifna reverse                   | CAGTTCCTTCATCCCGACCAG     | RT-qPCR (mouse) |
| Ifnb forward                   | CAGCTCCAAGAAAGGACGAAC     | RT-qPCR (mouse) |
| Ifnb reverse                   | GGCAGTGTA ACTCTTCTGCAT    | RT-qPCR (mouse) |
| Ifng forward                   | AAGTGGCATAGATGTGGAAG      | RT-qPCR (mouse) |
| Ifng reverse                   | GAATGCATCCTTTTTTCGCCT     | RT-qPCR (mouse) |
| GBP2 forward                   | CTATCTGCAATTACGCAGCCT     | RT-qPCR (human) |
| GBP2 reverse                   | TGTTCTGGCTTCTTGGGATGA     | RT-qPCR (human) |
| UBE2L6 forward                 | TGGACGAGAACGGACAGATTT     | RT-qPCR (human) |
| UBE2L6 reverse                 | GGCTCCCTGATATTCGGTCTATT   | RT-qPCR (human) |
| STAT1 forward                  | CAGCTTGACTCAAATTCCTGGA    | RT-qPCR (human) |
| STAT1 reverse                  | TGAAGATTACGCTTGCTTTTCCT   | RT-qPCR (human) |
| STAT3α/β forward               | TGCAGCAATAACCATTGACCT     | RT-qPCR (human) |
| STAT3α reverse                 | AGATTGCTCAAAGATAGCAGAAGT  | RT-qPCR (human) |
| STAT3β reverse                 | GTTTATCTGTGTGACACCATTTCAT | RT-qPCR (human) |
| GAPDH forward                  | TCTCCTCTGACTTCAACAGCG     | RT-qPCR (human) |
| GAPDH reverse                  | ACCACCCTGTTGCTGTAGCC      | RT-qPCR (human) |

133  
134

**Supplementary Table 3:** List of antibodies used in this study. \*Cell Signaling Technology (Danvers, MA, USA). \*\*TonBo Biosciences (Cytek Biosciences, CA, USA).

| Target              | Name                                                     | Company         | Article#     | Method         |
|---------------------|----------------------------------------------------------|-----------------|--------------|----------------|
| STAT3               | Stat3 (D3Z2G) Rabbit mAb                                 | Cell Signaling* | 12640S       | Western blot   |
| STAT3 Tyr705        | P-Stat3 (Y705) (D3A7) XP ® Rabbit mAb                    | Cell Signaling* | 9145S        | Western blot   |
| STAT3 Ser727        | P-Stat3 (S727) (D8C2Z) Rabbit mAb                        | Cell Signaling* | 94994S       | Western blot   |
| STAT1               | Stat1 Rabbit Ab                                          | Cell Signaling* | 9172P        | Western blot   |
| ACTIN               | Beta-Actin Rabbit Ab                                     | Cell Signaling* | 4967S        | Western blot   |
| HRP-linked Antibody | Anti-rabbit IgG HRP-linked Antibody                      | Cell Signaling* | 7074S        | Western blot   |
| CD16/CD32           | TruStain FcX™ anti-mouse CD16/32, clone: 93              | BioLegend       | 101320       | Flow cytometry |
| CD3                 | Anti-mouse CD3 violetFluor™ 450, clone: 17A2             | TonBo**         | 75-0032-U100 | Flow cytometry |
| Ter-119             | Anti-mouse TER-119 violetFluor™ 450, clone: TER-119      | TonBo**         | 75-5921-U10  | Flow cytometry |
| CD19                | Anti-mouse CD19 violetFluor™ 450, clone: 1D3             | TonBo**         | 75-0193-U100 | Flow cytometry |
| c-kit (CD117)       | PE/Cyanine5 anti-mouse CD117 (c-kit), clone: 2B8         | BioLegend       | 105810       | Flow cytometry |
| Sca-1 (Ly-GA/E)     | PE/Cyanine7 anti-mouse Ly-6A/E (Sca-1), clone: D7        | BioLegend       | 108114       | Flow cytometry |
| CD11b               | Anti-mo CD11b, eBioscience™ PE, clone:M1/70              | eBioscience     | 12-0112-82   | Flow cytometry |
| Gr-1 (Ly-6G)        | Anti-mouse Ly-6G (Gr-1) violetFluor™ 450, clone: RB6-8C5 | TonBo**         | 75-5931-U100 | Flow cytometry |
| IFNAR-1             | PE anti-mouse IFNAR-1 Antibody, clone: MAR1-5A3          | BioLegend       | 127312       | Flow cytometry |
| 7-AAD               | eBioscience™ 7-AAD Viability Staining                    | eBioscience     | 00-6993-50   | Flow cytometry |
| Annexin V           | Pacific Blue™ Annexin V                                  | BioLegend       | 640917       | Flow cytometry |

135

# Edtmayer et al. Supplementary Figure 1

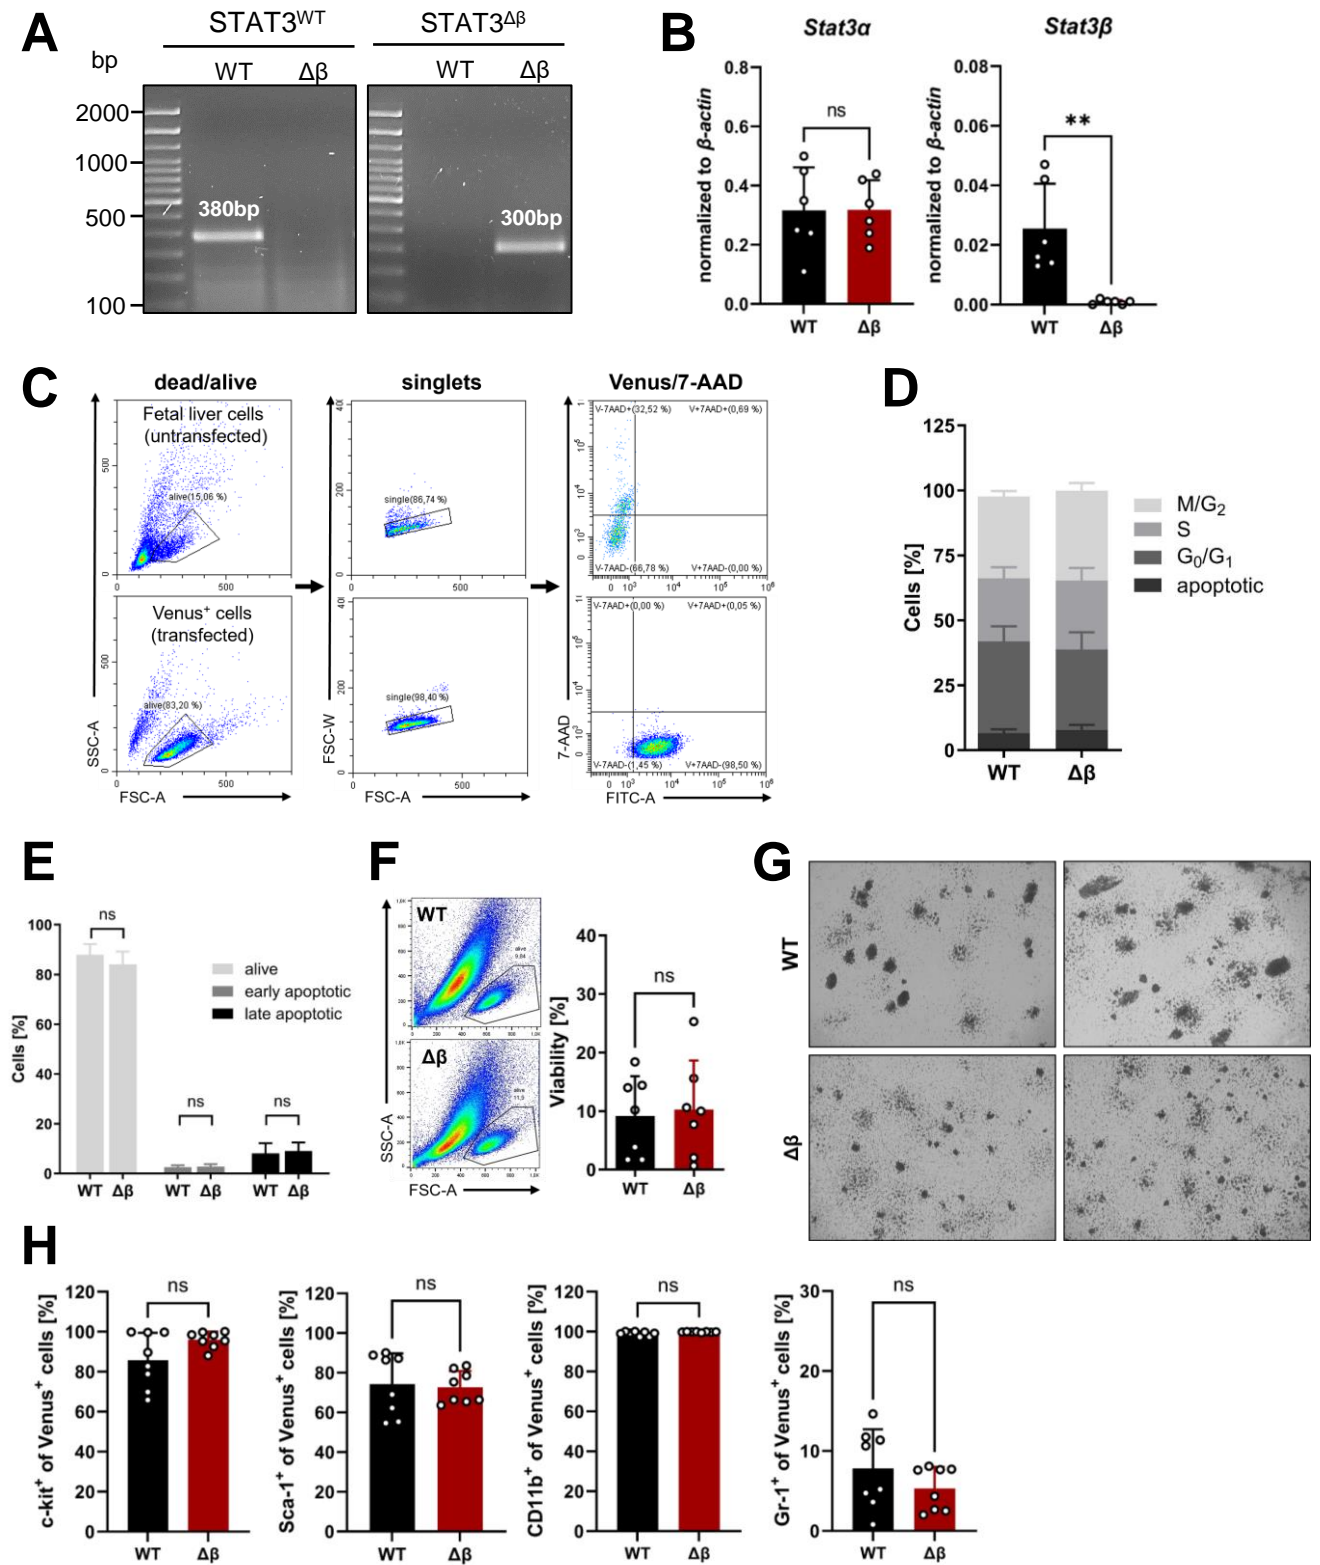

## Supplementary Figure 1: STAT3β deficiency does not affect cell cycle and apoptosis *in vitro*.

(A) Genotyping PCR products of the used animal offspring and cells. (B) RT-qPCR analysis of *Stat3α* and *Stat3β* expression in STAT3β-deficient leukemia cells (n=6, 3 independent experiments, 2 different cell lines). (C) Gating strategy for 7-AAD-Venus<sup>+</sup> cells and untransfected fetal liver cells as negative control analyzed *via* flow cytometry. (D) Cell cycle analysis *via* flow cytometry using 7-AAD in suspension culture (n=6, 3 independent experiments, 2 cell lines). (E) Apoptosis analysis *via* flow cytometry using Annexin V and 7-AAD in suspension culture (n=8, 3 independent experiments, 2-3 cell lines). (F) Viability according to FSC and SSC after 7 days in methylcellulose with representative dot plots (n=6, 2 independent experiments with 3 serial replating). (G) Immunophenotyping of *MLL-AF9* transformed FLCs *via* flow cytometry (n=8, 3 independent experiments, 2-3 cell lines). Statistical analysis was performed using Student's *t*-test. p ≤ 0.01: \*\*. Error bars represent means ± SD



## Edtmayer et al. Supplementary Figure 2

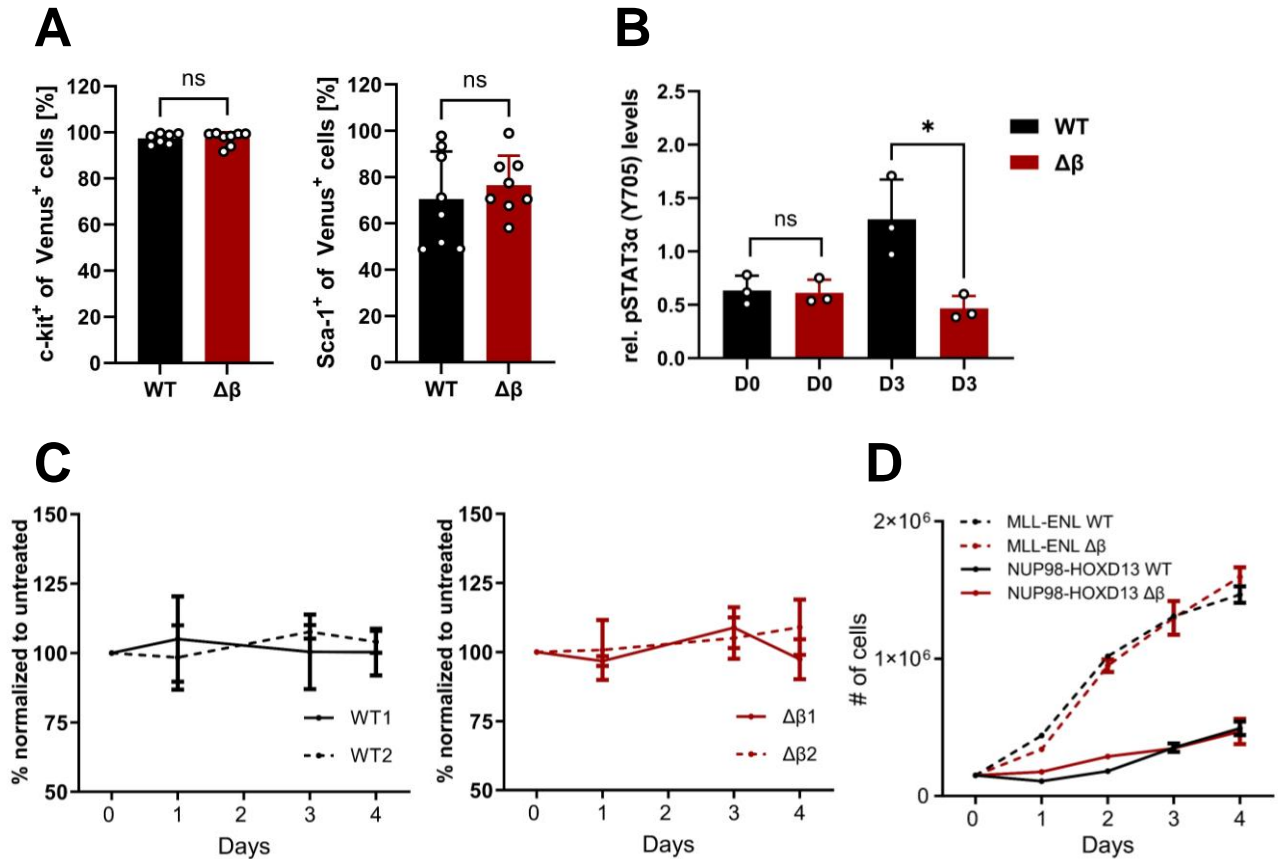

### Supplementary Figure 2: G-CSF stimulation does not affect proliferation of leukemia cells.

(A) Immunophenotyping after 10 days of G-CSF stimulation *via* flow cytometry (n=8, 3 independent experiments, 2-3 cell lines). (B) Western blot quantification of Y705 phosphorylation on STAT3α after 3 days of G-CSF stimulation normalized to ACTIN (n=3, independent experiments). (C) Representative growth curves of *MLL-AF9* transformed FLCs in the presence of 10ng/ml G-CSF (2 experiments, 3 different cell lines). (D) Representative growth curves of *MLL-ENL* and *NUP98-HOXD13* transformed FLCs (n=2, 2 independent experiments). Statistical analysis was performed using Student's *t*-test. p ≤ 0.05:\*. Error bars represent means ± SD.

# Edtmayer et al. Supplementary Figure 3

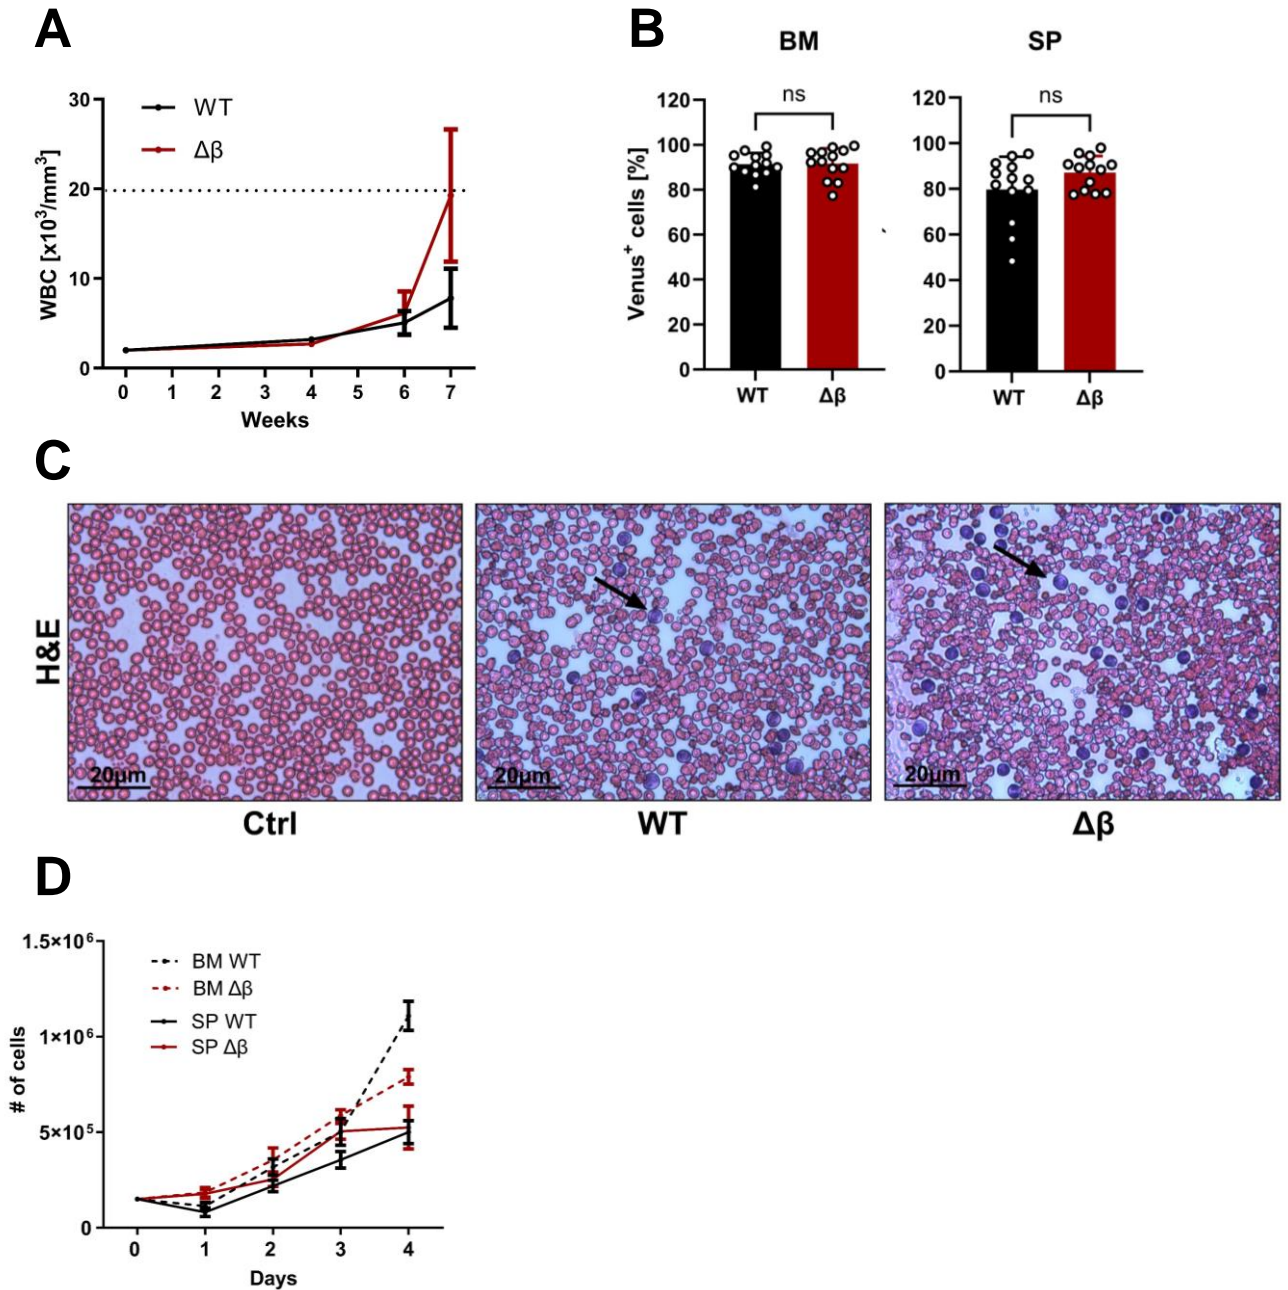

**Supplementary Figure 3: Absence of STAT3 $\beta$  accelerates disease progression *in vivo*.** (A) WBC was monitored for 7 weeks post transplantation (one representative experiment,  $n \geq 3$  per group). (B) Quantification of infiltrating blasts (Venus<sup>+</sup>) in the BM and SP of diseased animals *via* flow cytometry ( $n=13$ ). (C) Representative H&E-stained blood smears of a healthy control (Ctrl) and diseased animals (40x magnification). Black arrows indicate blasts. (D) Proliferation of BM- and SP-derived *ex vivo* cells *in vitro* ( $n=3$ , 3 different cell lines per group). Error bars represent means  $\pm$  SD. (H&E Hematoxylin and eosin)

# Edtmayer et al. Supplementary Figure 4

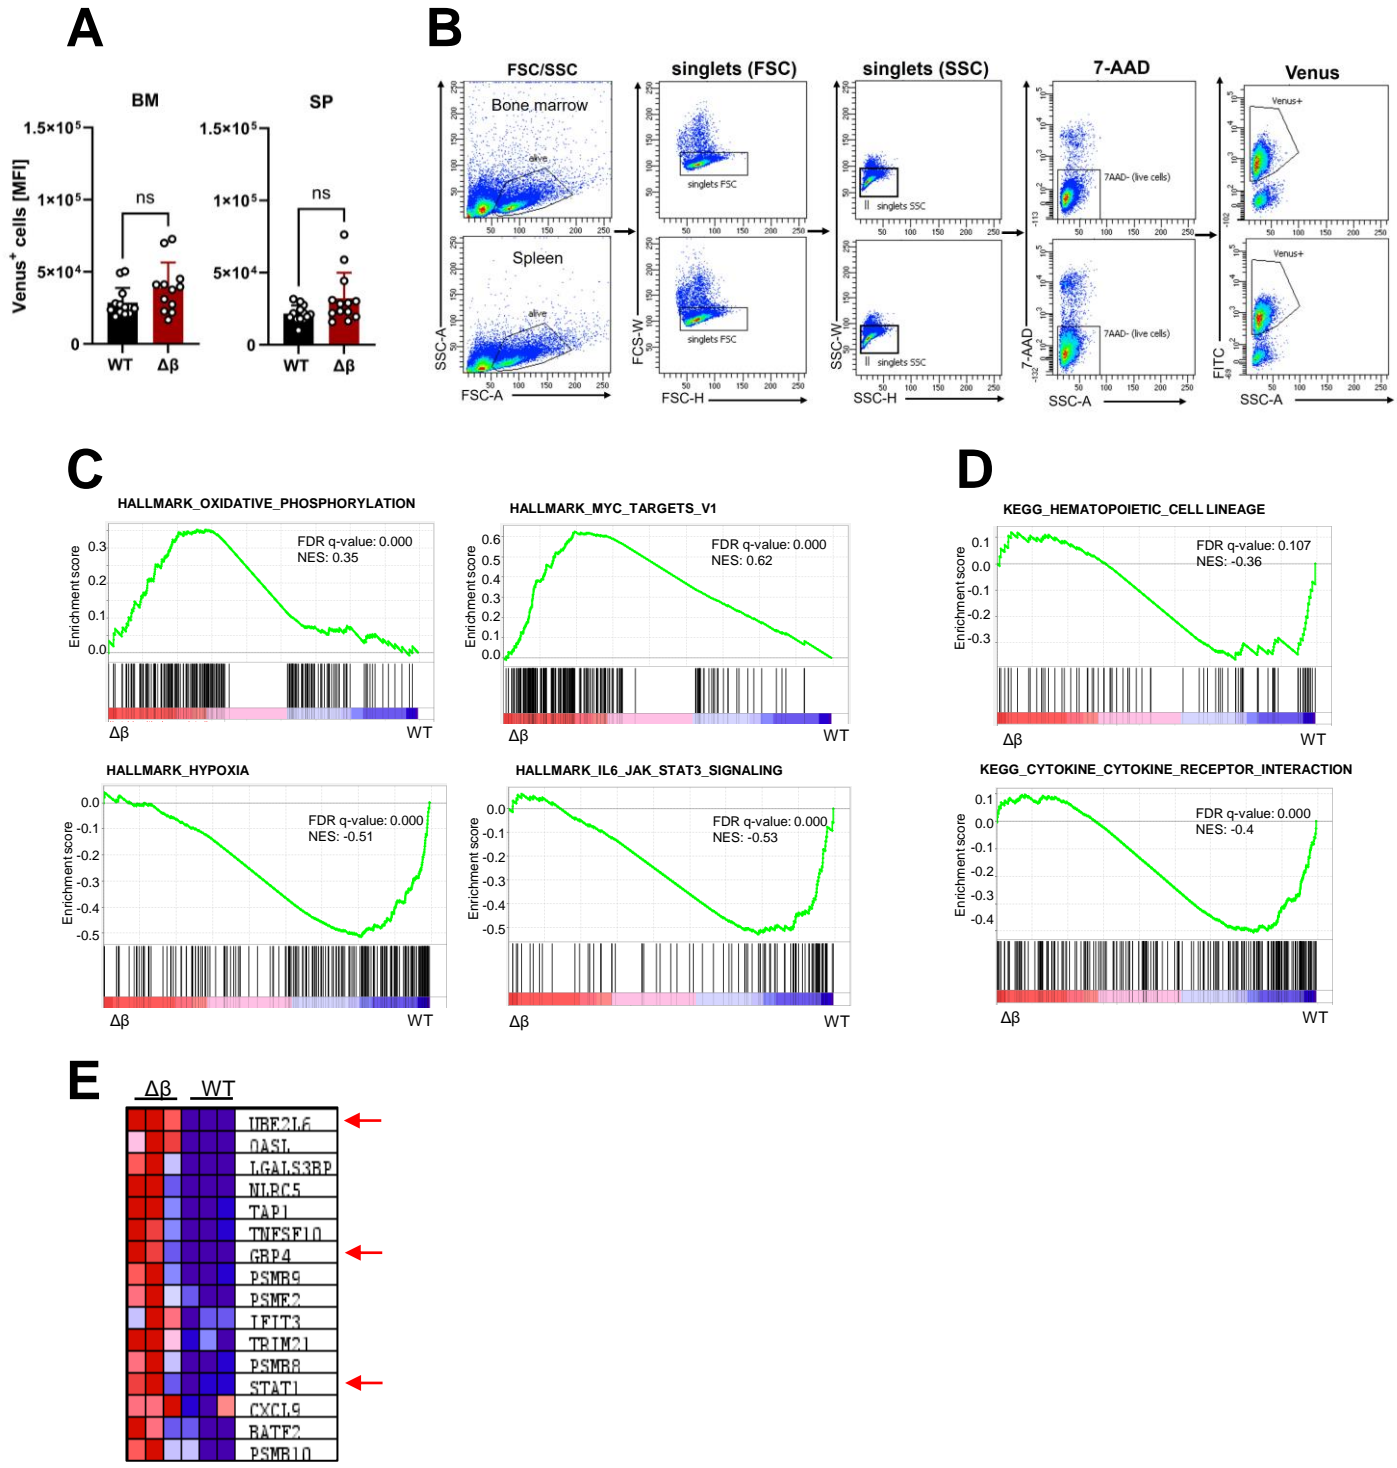

**Supplementary Figure 4: Gene expression analysis of blasts isolated from diseased animals. (A)** MFI of Venus<sup>+</sup> blasts derived from BM and SP of diseased animals analyzed *via* flow cytometry (n=12). **(B)** Sorting strategy for Venus<sup>+</sup> cells from BM and SP of diseased animals. **(C)** GSEA of leukemic blasts lacking STAT3 $\beta$  compared to WT cells isolated from SP of diseased animals (FDR False discovery rate, NES normalized enrichment score). **(D)** KEGG pathway analysis of blasts lacking STAT3 $\beta$  compared to WT. **(E)** Heat map of top-ranked genes in the IFN signatures from SP-derived blasts (core enrichment, rank in metric score >1). Statistical analysis was performed using Student's *t*-test. Error bars represent means  $\pm$  SD. (GSEA Gene set enrichment analysis, KEGG Kyoto Encyclopedia of Genes and Genomes, MFI Mean fluorescence intensity)

# Edtmayer et al. Supplementary Figure 5

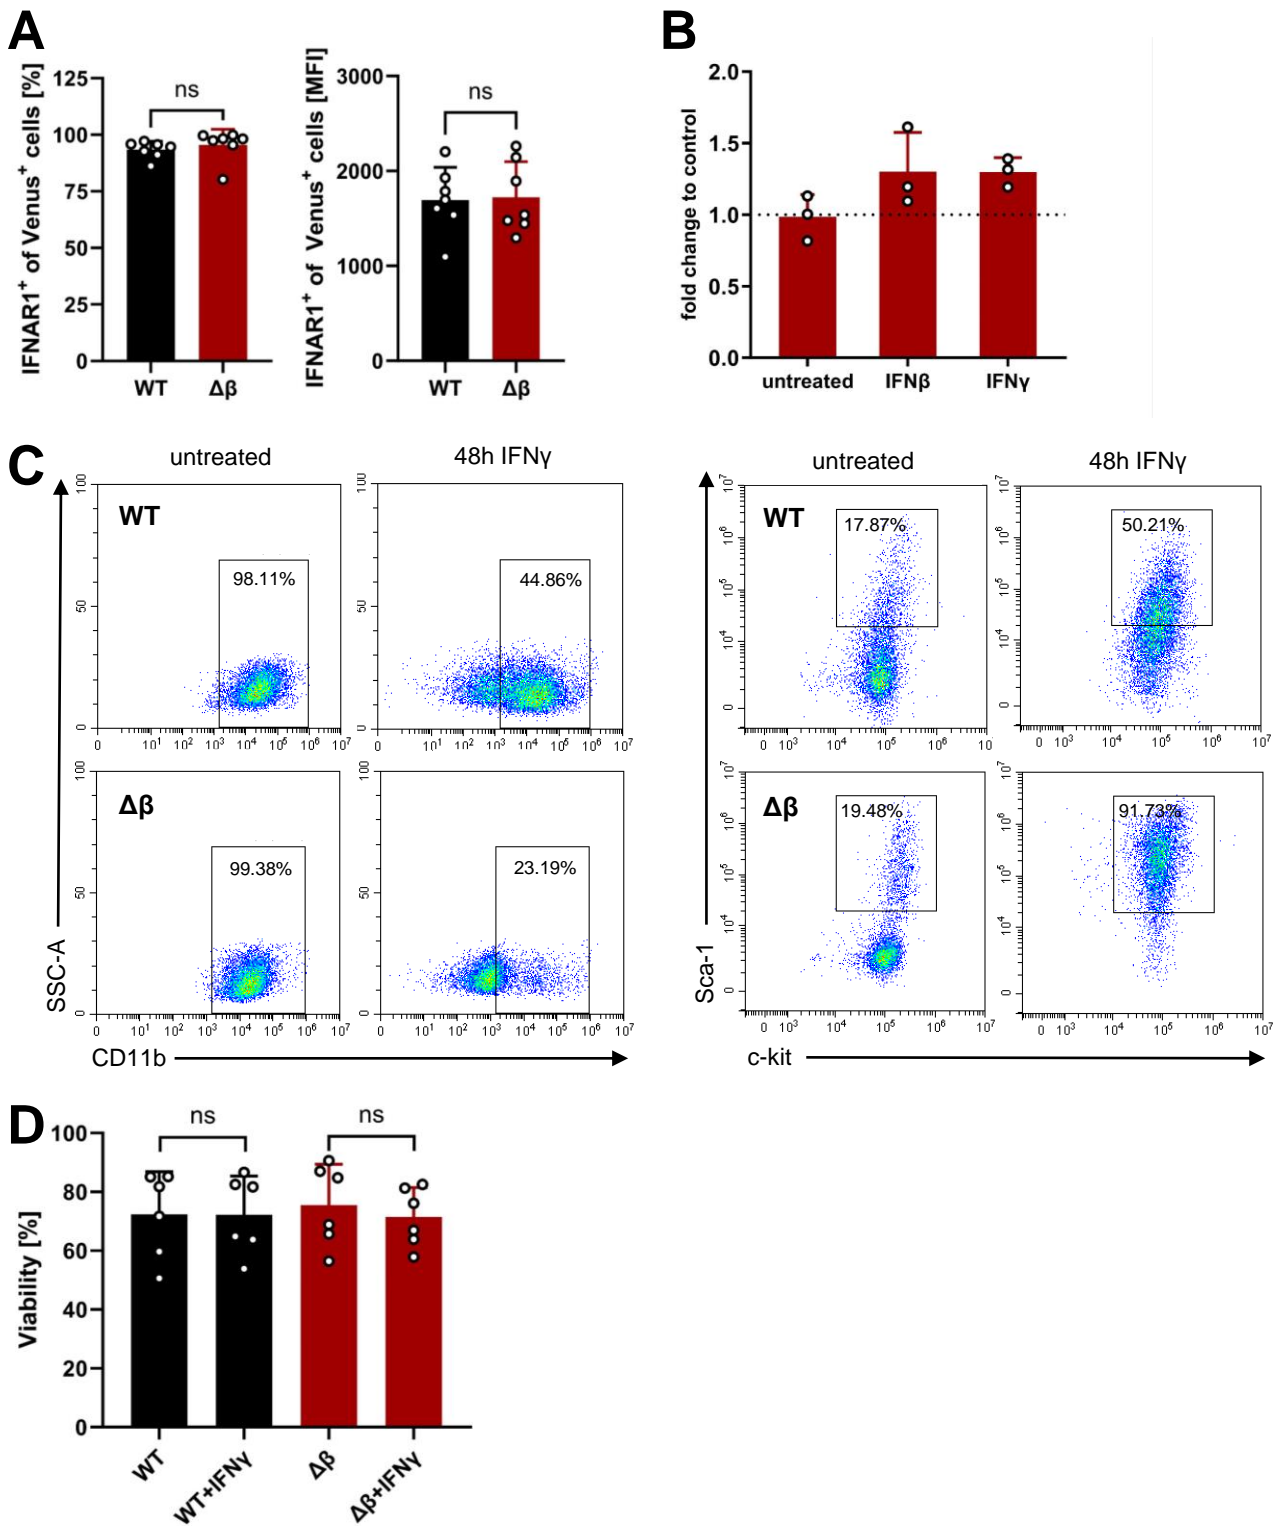

**Supplementary Figure 5: STAT3 $\beta$ -deficiency increases IFN responsiveness.** (A) Expression of the surface receptor IFNAR1 analyzed via flow cytometry (n=7, 3 independent experiments, 2-3 different cell lines). (B) Western blot quantification of STAT1 protein expression in STAT3 $\beta$ -deficient leukemia cells compared to WT cells after 24h IFN $\beta$  or IFN $\gamma$  stimulation. Quantification of 3 independent experiments. (C) Representative dot plots of 48h IFN $\gamma$  treated leukemia cells. Left: CD11b, Right: LSK. (D) Viability (according to FSC and SSC) after 48h IFN $\gamma$  treatment with representative dot plots (n=6, 3 independent experiments, 2 different cell lines). Statistical analysis was performed using Student's *t*-test. Error bars represent means  $\pm$  SD.

# Edtmayer et al. Supplementary Figure 6

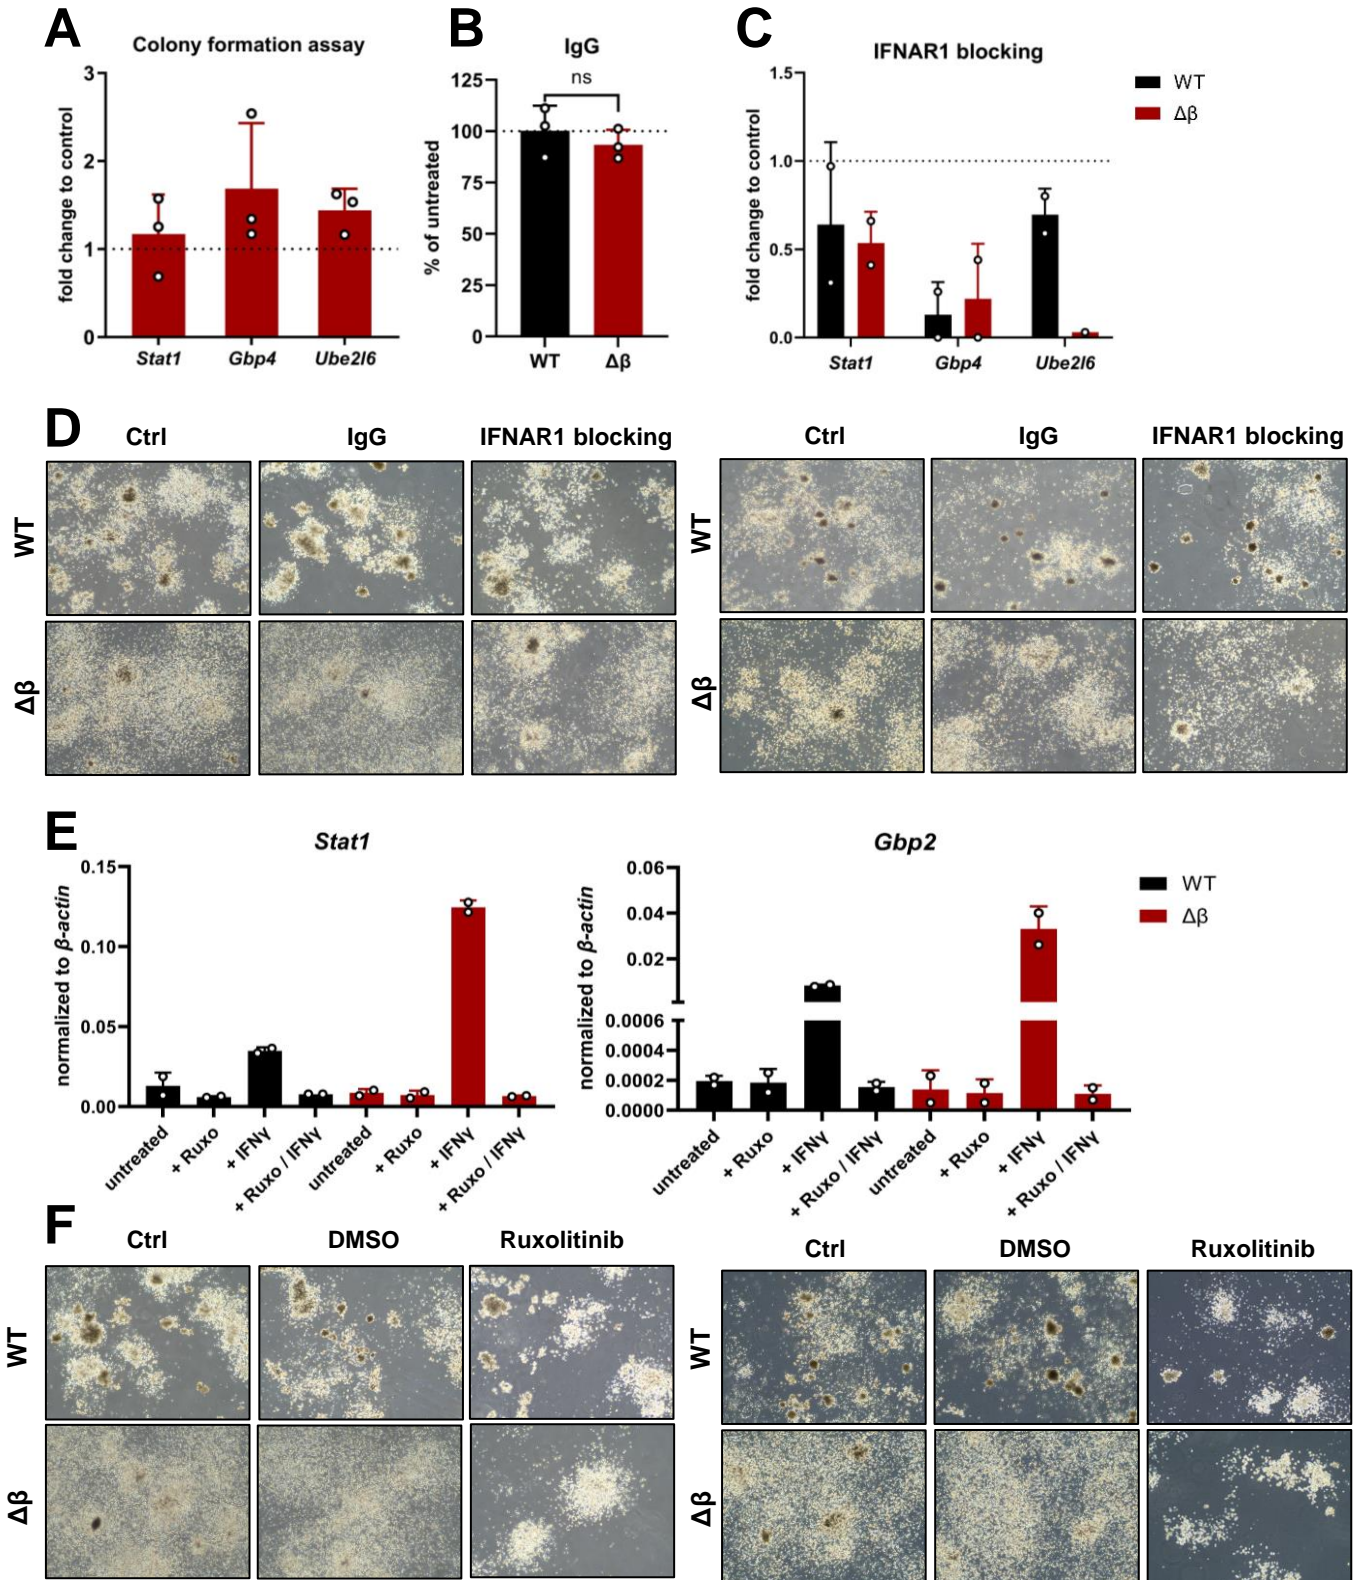

**Supplementary Figure 6: Ruxolitinib effectively blocks IFN signaling in leukemia cells.** (A) RT-qPCR confirms expression of IFN-inducible genes in colonies formed by leukemia cells after 7 days in methylcellulose (n=3, independent experiments). (B) CFA in the presence of 2 $\mu$ g/ml isotype (IgG) control normalized to untreated. (n=3, independent experiments). (C) Reduced expression of IFN-inducible genes after 7 days in methylcellulose in presence of IFNAR1 blocking analyzed via RT-qPCR (n=2, independent experiments). (D) Additional representative pictures of colonies formed in presence of IFNAR1 blocking antibody (2 independent experiments). (E) RT-qPCR confirms that IFN $\gamma$  response is efficiently blocked by Ruxolitinib (Ruxo). Leukemia cells were treated with 5 $\mu$ M Ruxolitinib for 30min followed by 3h IFN $\gamma$  stimulation (100ng/ml) (n= 2, independent experiments). Data were not statistically compared. Error bars represent means  $\pm$  SD. (F) Additional representative pictures of colonies formed in presence of 5 $\mu$ M Ruxolitinib (2 independent experiments).

# Edtmayer et al. Supplementary Figure 7

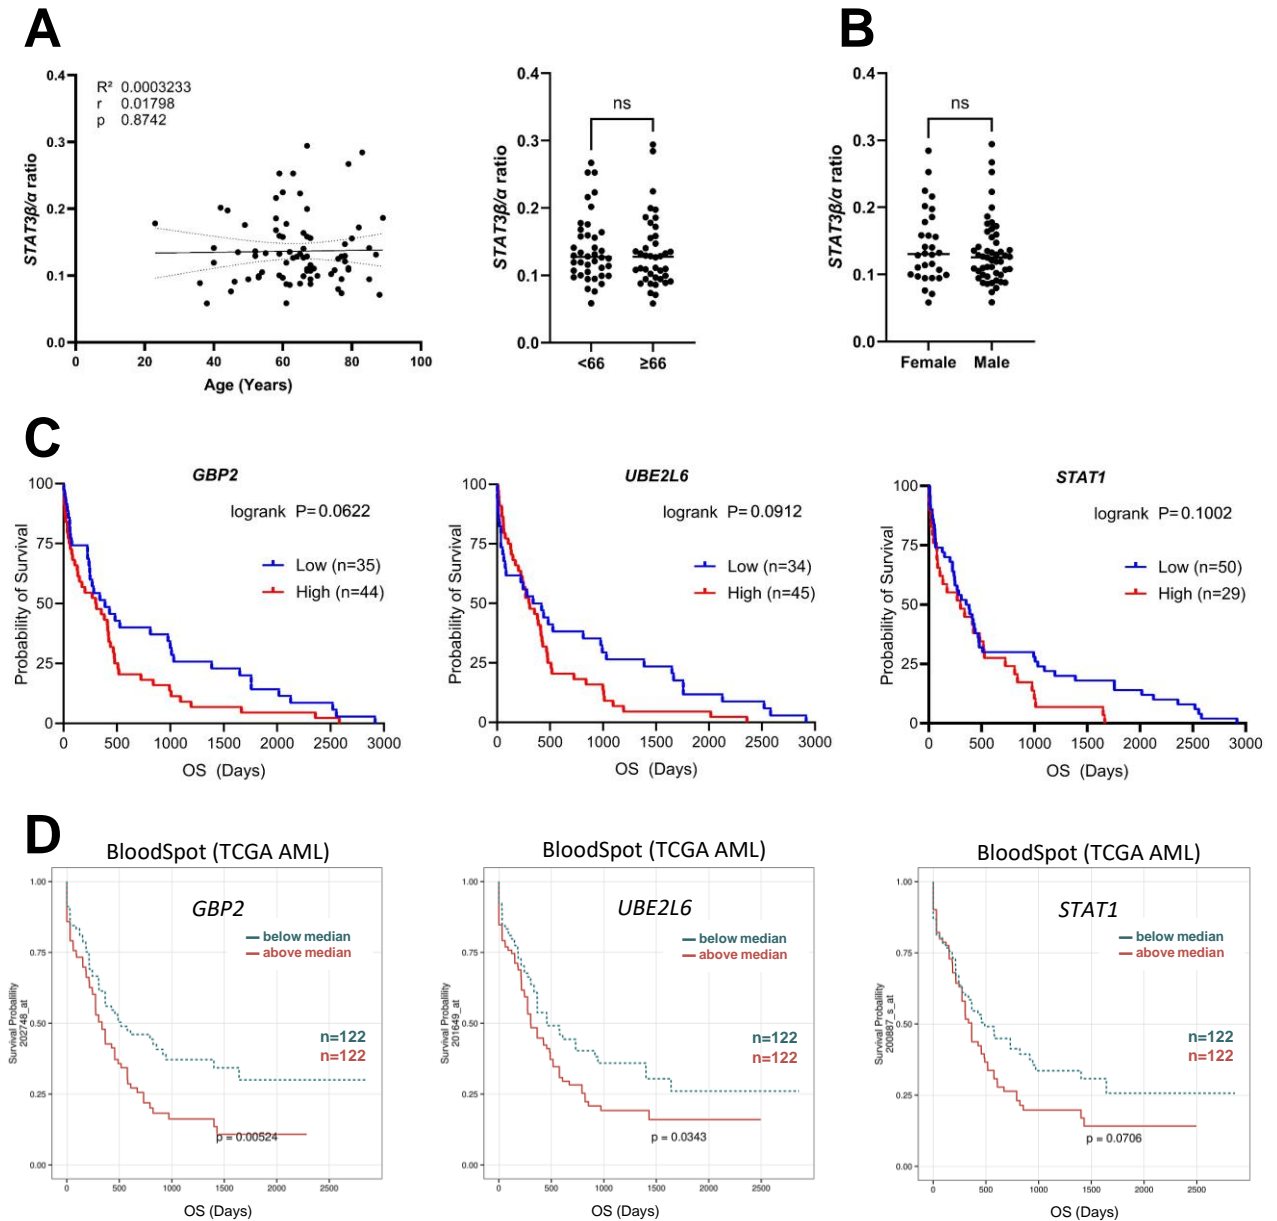

**Supplementary Figure 7: Analysis of IFN-inducible genes in AML patients.** (A) Pearson correlation of *STAT3 $\beta$ / $\alpha$*  mRNA ratio with age of patients at time of diagnosis (n=79). (B) *STAT3 $\beta$ / $\alpha$*  mRNA ratio according to the patient gender (females: n=29, males: n=50). Data was analyzed using Student's t-test. (C) Expression of IFN-inducible genes (*GBP2*, *UBE2L6*, *STAT1*) correlated with survival in AML patient samples (n=79). Gene expression was measured *via* RT-qPCR and normalized to GAPDH. Patients were stratified according to the best cut-off value. Statistical analysis was performed using log-rank (Mantel-Cox) test. (D) Kaplan-Meier analysis of IFN-inducible genes using the publicly available AML TCGA dataset (Affymetrix U133 Plus 2) of 244 patients accessed *via* BloodSpot. Patients were stratified based on gene expression above or below median. (TCGA The Cancer Genome Atlas)
