# Supplementary material for: A novel function of STAT3β in suppressing interferon response improves outcome in acute myeloid leukemia
Source: PubMed Central journal article supplement (PMC11133483; doi:10.1038/s41419-024-06749-9), 2024-05-28

# Edtmayer et al. - Original Western Blots

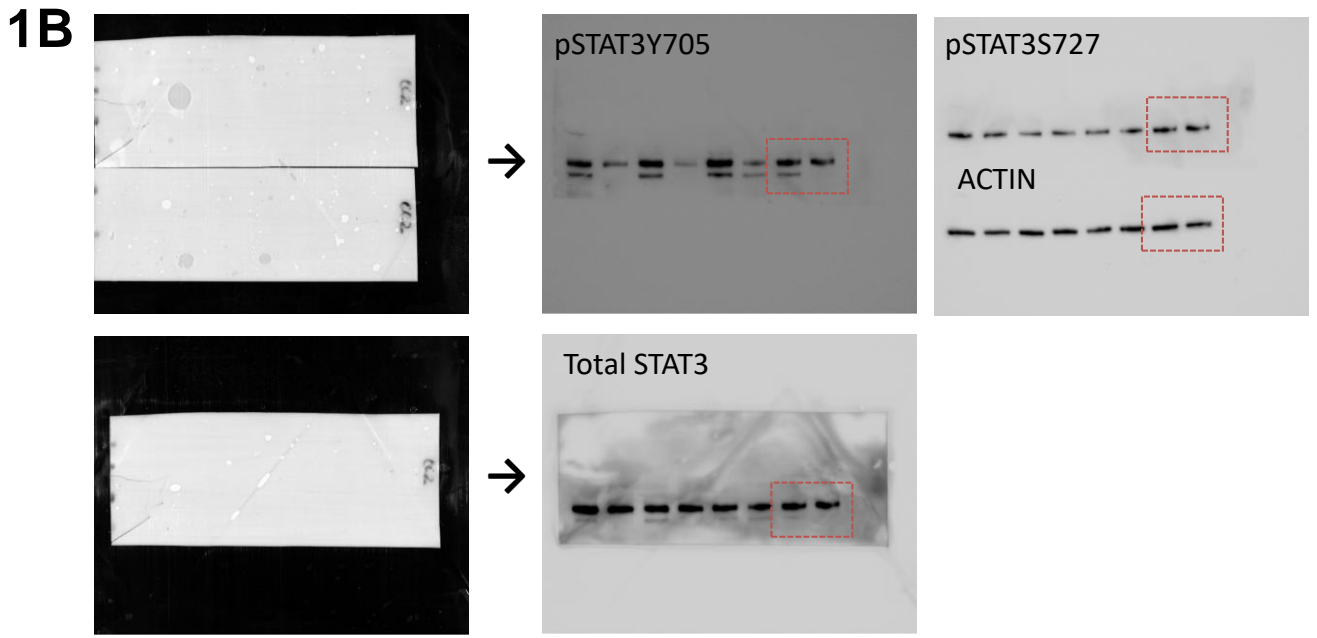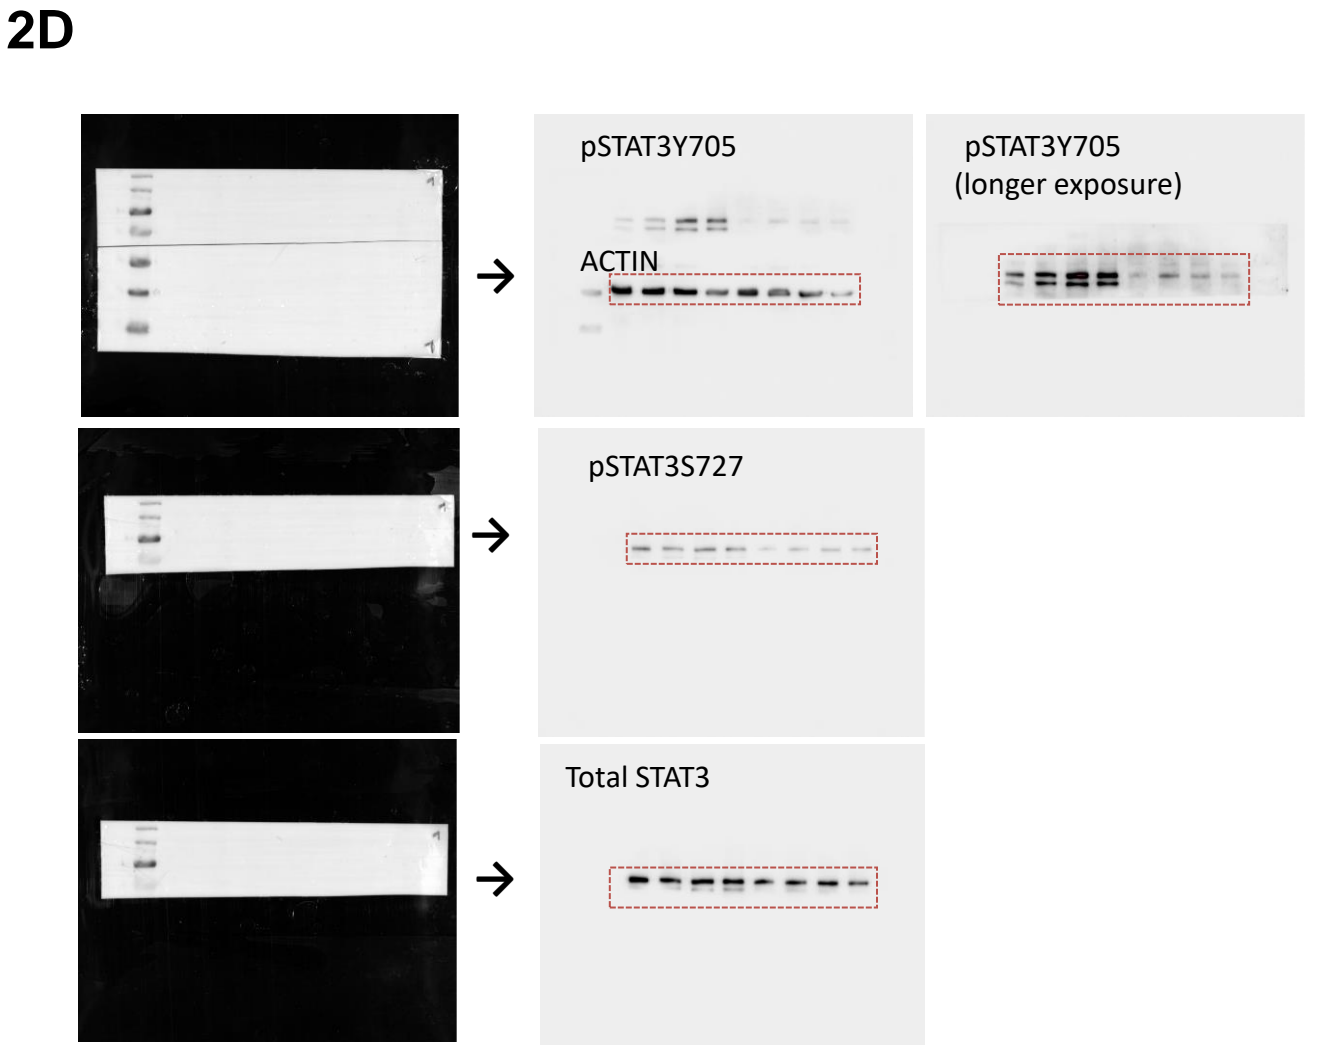

5C

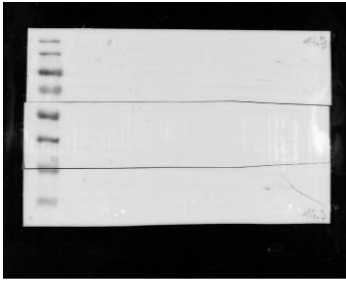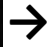

pSTAT1  
ACTIN (very weak)  
Protein not shown

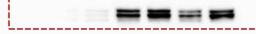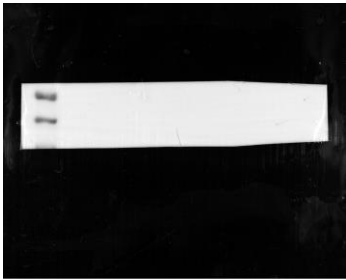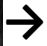

ACTIN (longer exposure)

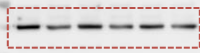

Supplement: 41419_2024_6749_MOESM2_ESM.pdf [file 41419_2024_6749_MOESM2_ESM.pdf]
